# Supplementary material for: Stable cellulose/graphene inks mediated by an inorganic base for the fabrication of conductive fibers
Source: Royal Society of Chemistry journal article supplement (doi:10.1039/d0tc05899h), 2021-01-01
Supplement: d0tc05899h2.pdf [file d0tc05899h2.pdf]

## Supporting Information

### Stable Cellulose/Graphene Inks Mediated by Inorganic Base for the Fabrication of Conductive Fibers

Shaoxue Pan,<sup>a</sup> Peng Wang,<sup>b</sup> Peiying Liu,<sup>a</sup> Tianqi Wu,<sup>a</sup> Yicheng Liu,<sup>a</sup> Jianhua Ma <sup>\*c</sup> and Hongbin Lu<sup>\* a</sup>

- a. State Key Laboratory of Molecular Engineering of Polymers, Department of Macromolecular Science, Collaborative Innovation Center of Polymers and Polymer Composites, Fudan University, 2005 Songhu Road, Shanghai 200438, China
- b. Institute of Chemical Materials, China Academy of Engineering Physics, Mianyang 621900, China
- c. School of Materials Science and Engineering, Xi'an Polytechnic University, Xi'an, Shaanxi 710048, China

## **Note S1. Molecular Simulation Methodology**

All simulations were done with the Large-scale Atomic/Molecular Massively Parallel Simulator (LAMMPS) software package.<sup>1</sup> The molecular structure of graphene was generated using the Make-Graphitics program developed by Sinclair et al.<sup>2,3</sup> The size of the graphene used in the simulation is  $60 \times 60 \text{ \AA}^2$ , the C/O ratio is 8.47, the ratio of carboxyl groups to hydroxyl groups in the edge region is 4:1, and the number of hydroxyl groups in the middle region is 3. Since the size of the graphene used in the simulation is much smaller than the graphene in the experiment, in order to balance the C/O ratio and the density of oxygen-containing functional groups at the edge of the graphene, it is reasonable to use a slightly lower C/O ratio. Considering that the size of graphene in the experiment is larger than the length of the cellulose molecular chain, the cellulose molecular chain used in the simulation contains 10 monomers and the length is about  $48 \text{ \AA}$ . Moreover, the effect of LiOH-urea which has been removed from the wet-state fibers has been ignored. First, a simulation box with a size of  $90 \times 90 \times 208 \text{ \AA}^3$  was built using the Packmol program package, containing 2 graphene nanosheets arranged in parallel up and down and 144 cellulose molecular chains distributed between the graphene nanosheets. The cellulose chains in the initial configuration are placed along the x-direction, and the opposite pulling force of  $2 \text{ Kcal/\AA}^2$  is applied at both ends to maintain its orientation, while the movement of the carbon atoms of graphene in the x- and y-directions are limited by a spring potential and only allows movement in the z-direction. Then, the Nose-Hoover algorithm is used to maintain the temperature at 500K, and after several cycles of "decrease-rise-decrease the dielectric

constant", run 4 million steps to slowly reduce the dielectric constant to 1.0. Then, run another 500,000 steps to gradually reduce the temperature to 298K, and then continue to run 500,000 steps to make the system closer to equilibrium. In the final 500,000 steps simulation, the tensile force acting on both ends of the cellulose molecular chain and the spring potential limiting the movement of graphene were canceled to relax the stress generated by the tensile force and spring potential. In equilibrium molecular dynamics, the total simulation time is 100 ns. In the stretching non-equilibrium molecular dynamics simulation, the time step is 0.25 fs, the stretching direction is the x-direction, the engineering tensile strain rate is  $10^{10}/s$ , and the y- and z-directions maintain a pressure of 1.0 atm. To facilitate the analysis of the hydrogen bond energy, all the energy of the system was evaluated by the ReaxFF force field.<sup>4</sup> The visualization of the simulation system was done with VMD 1.9.2 and Ovito 3.0.<sup>5,6</sup>

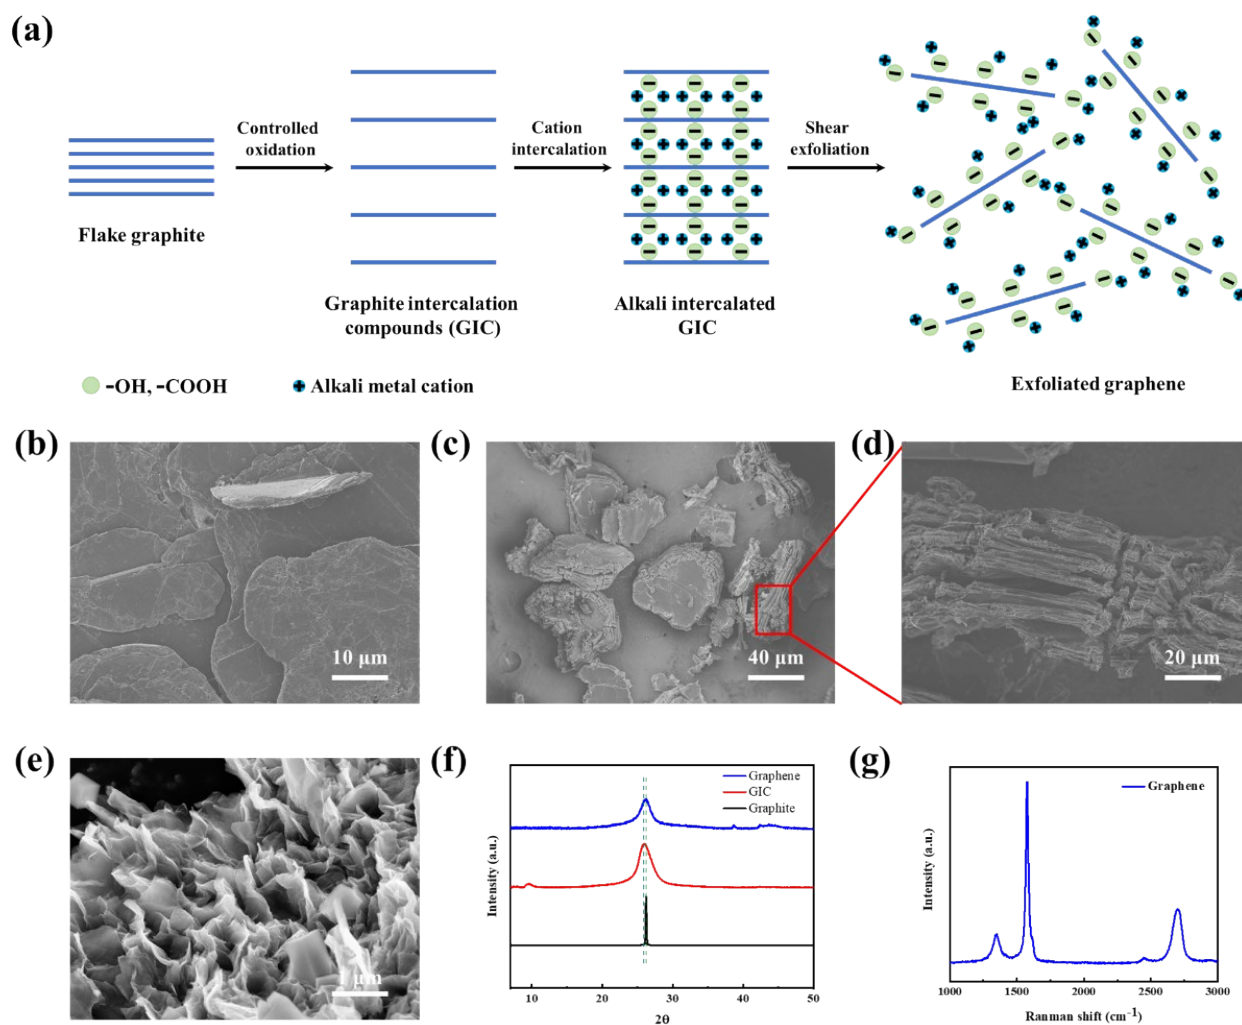

**Figure S1.** (a) Schematic illustration of the preparation of graphene nanosheets. SEM images of (b) flake graphite, (c, d) graphite intercalation compounds (GIC) and (e) freeze-dried graphene slurry. (f) XRD patterns of flake graphite, graphite intercalation compounds and dry graphene powder. (g) Raman spectra of graphene, showing a low  $I_D/I_G$  ratio.

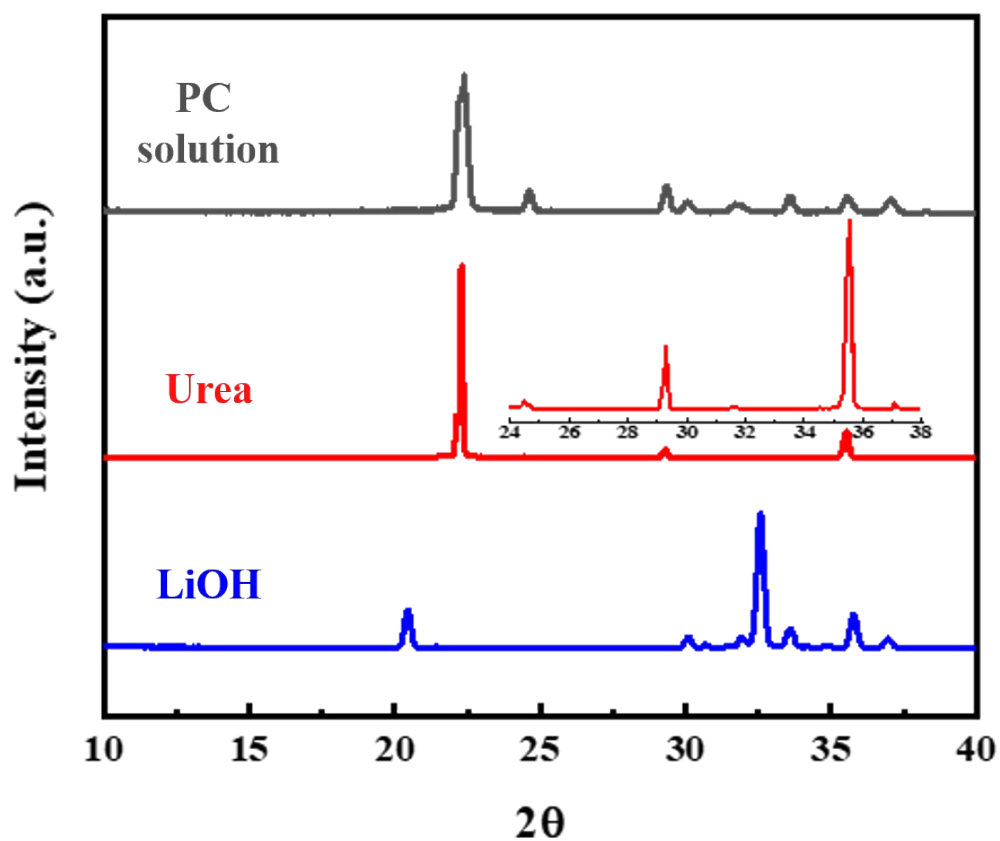

**Figure S2.** XRD patterns of the freeze-dried PC solution, urea powder and LiOH powder. The disappearance of cellulose crystallization peak indicated that cellulose was dissolved in LiOH-urea solution.<sup>7</sup>

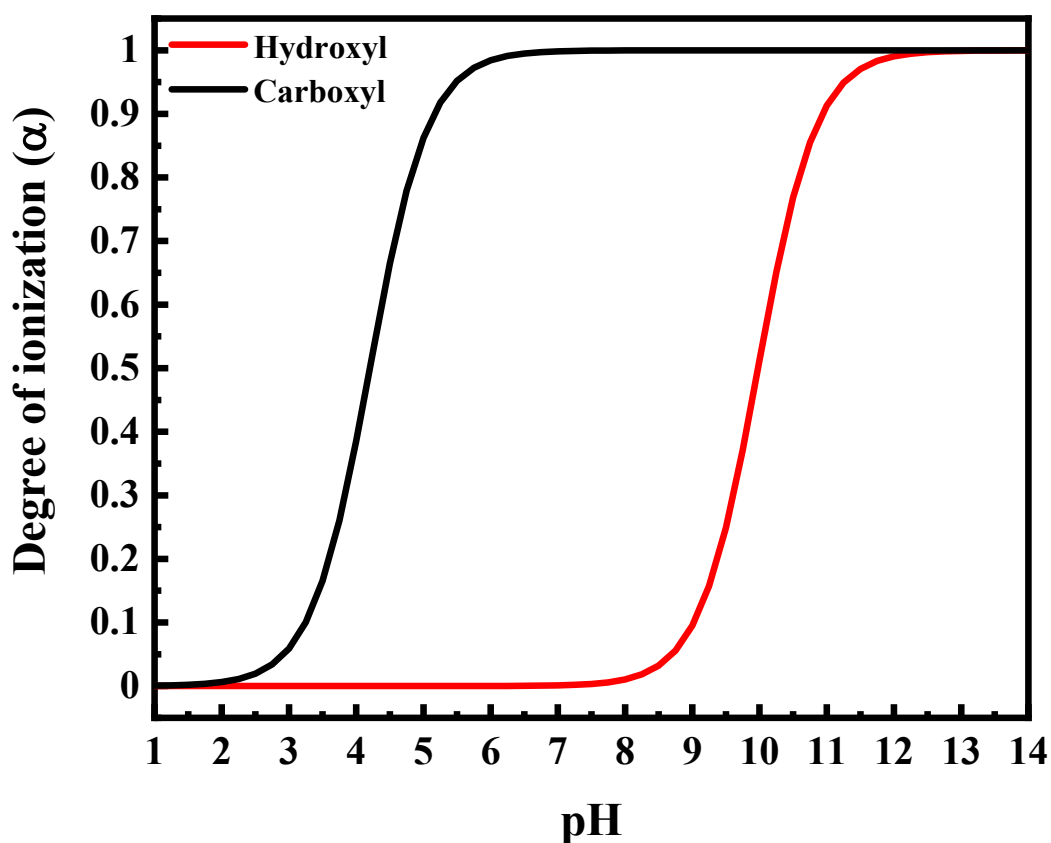

**Figure S3.** Ionization curve of phenolic hydroxyl groups and carboxyl groups on graphene nanosheets. Degree of ionization ( $\alpha$ ) =  $K_a / (K_a + 10^{-\text{pH}})$ . The ionization equilibrium constants ( $K_a$ ) of benzoic acid and phenol are  $6.27 \times 10^{-5}$  and  $1.05 \times 10^{-10}$  at 25 °C respectively.<sup>8,9</sup> It is generally believed that the only functional groups that can ionize on the surface of graphene are -COOH and -OH.<sup>10</sup> By calculating the degree of ionization ( $\alpha$ ) of benzoic acid and phenol, the ionization of groups on the surface of graphene can be indirectly reflected. The ionization curve shows that the -COOH groups on the graphene surface were almost completely ionized at pH=7, and the ionization degree of -OH increases from 1% to 99% at the pH range of 8.0~12.0. Therefore, the ionization of graphene surface groups depends on -OH in alkaline

environment, which is consistent with the fact that the graphene prepared at room temperature and low water content is mainly -OH and epoxy groups.<sup>11</sup>

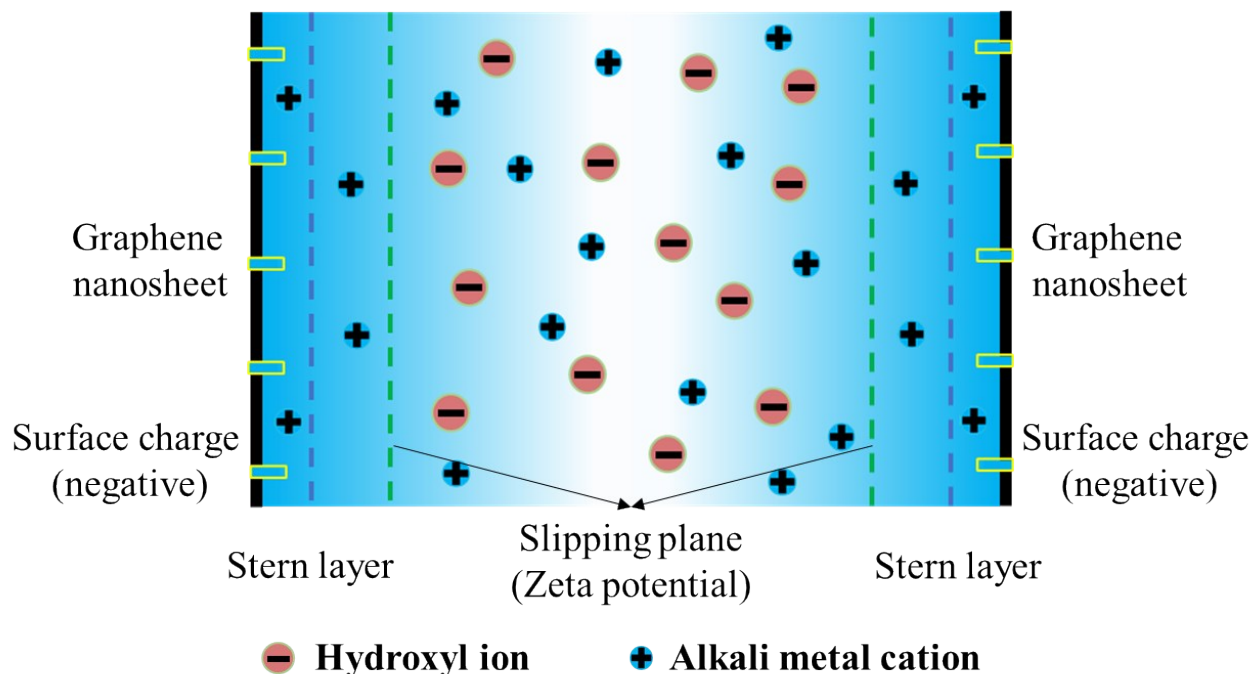

**Figure S4.** Schematic diagram of electric double layer model of graphene nanosheets in alkaline aqueous solution.<sup>10,12</sup> The phenolic hydroxyl groups ionized under the action of hydroxide ions on the graphene surface carried a negative charge and adsorbed Li-ions in the solution through electrostatic action. The inner region where Li-ions and ionized -OH groups are tightly combined is called the stern layer, and the outer diffusion region where Li-ions are not so tightly absorbed. A boundary abstracted from the diffusion zone is called the slipping plane. In this plane is a stable entity composed of Li-ions and ionized -OH groups, and the formed Li-ions layer will move with the movement of the graphene nanosheets. The zeta potential is the potential from the slipping plane to the bulk solution. When the pH continues to increase, the -OH group has been completely ionized, and the ion concentration in the bulk solution increases,

repelling each other, and more Li-ions will be squeezed into the sliding plane, neutralizing the negative charge, making the absolute value of the zeta potential change small.

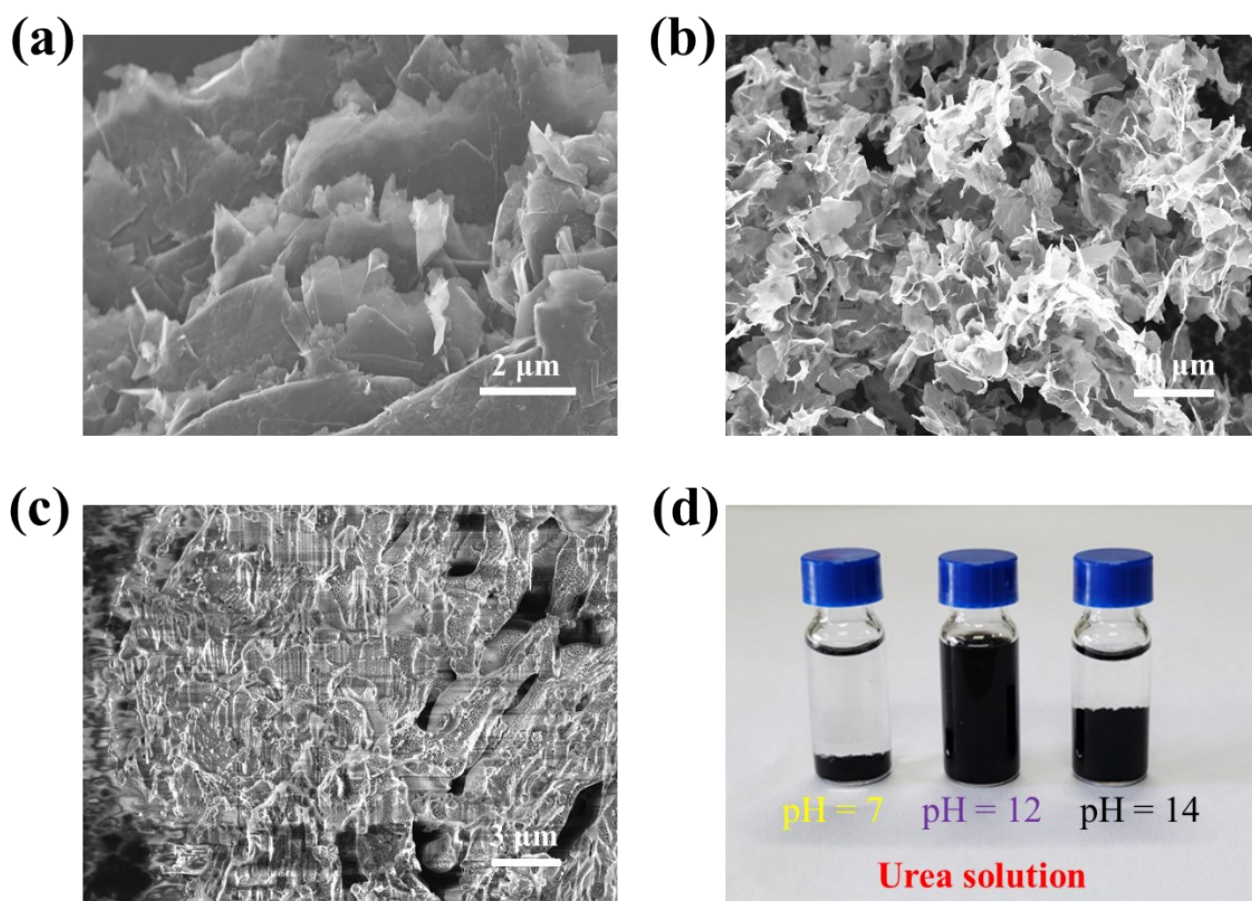

**Figure S5.** SEM images of graphene with (a) close  $\pi$ - $\pi$  stacking structure in water (pH = 7), (b) uniformly dispersed structure in LiOH solution (pH = 12) and (c) loosely stacking structure in LiOH-urea solution (pH = 14). (d) Digital images of graphene in urea aqueous solution with different pH.



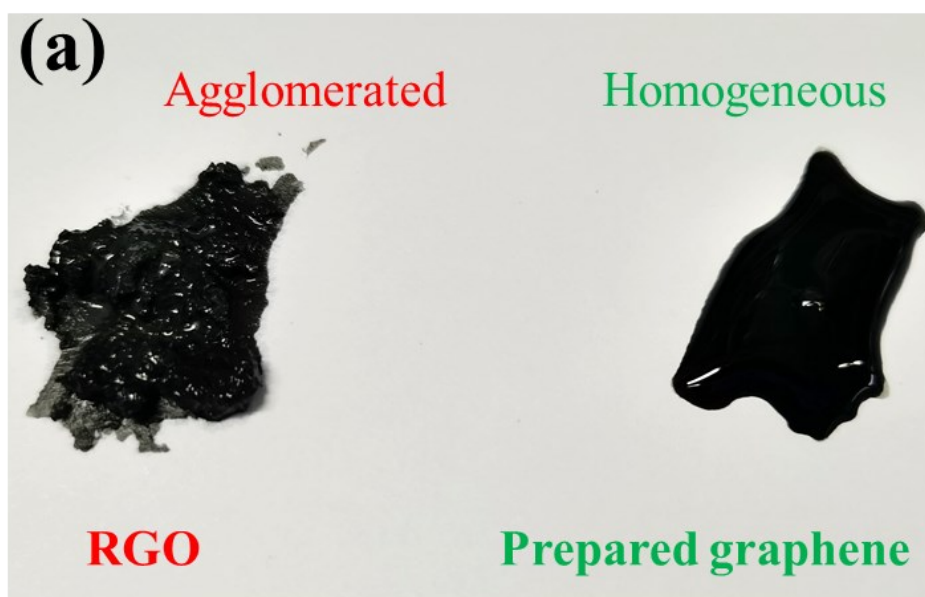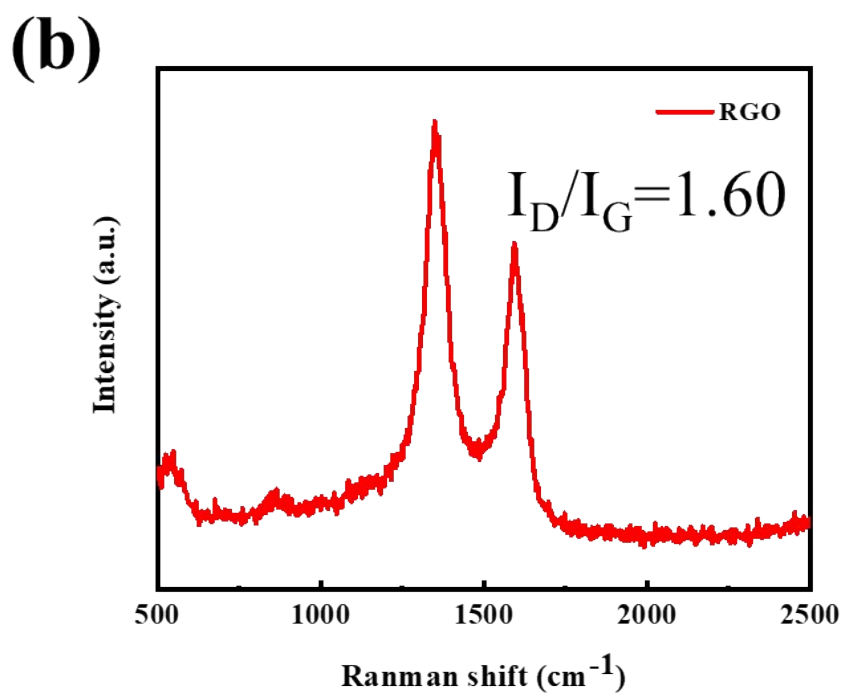

**Figure S6.** (a) Digital images of cellulose/RGO (left) and CG (right) inks both containing 10 wt% graphene in LiOH-urea aqueous solution. (b) Raman spectra of RGO, showing a high  $I_D/I_G$  ratio.

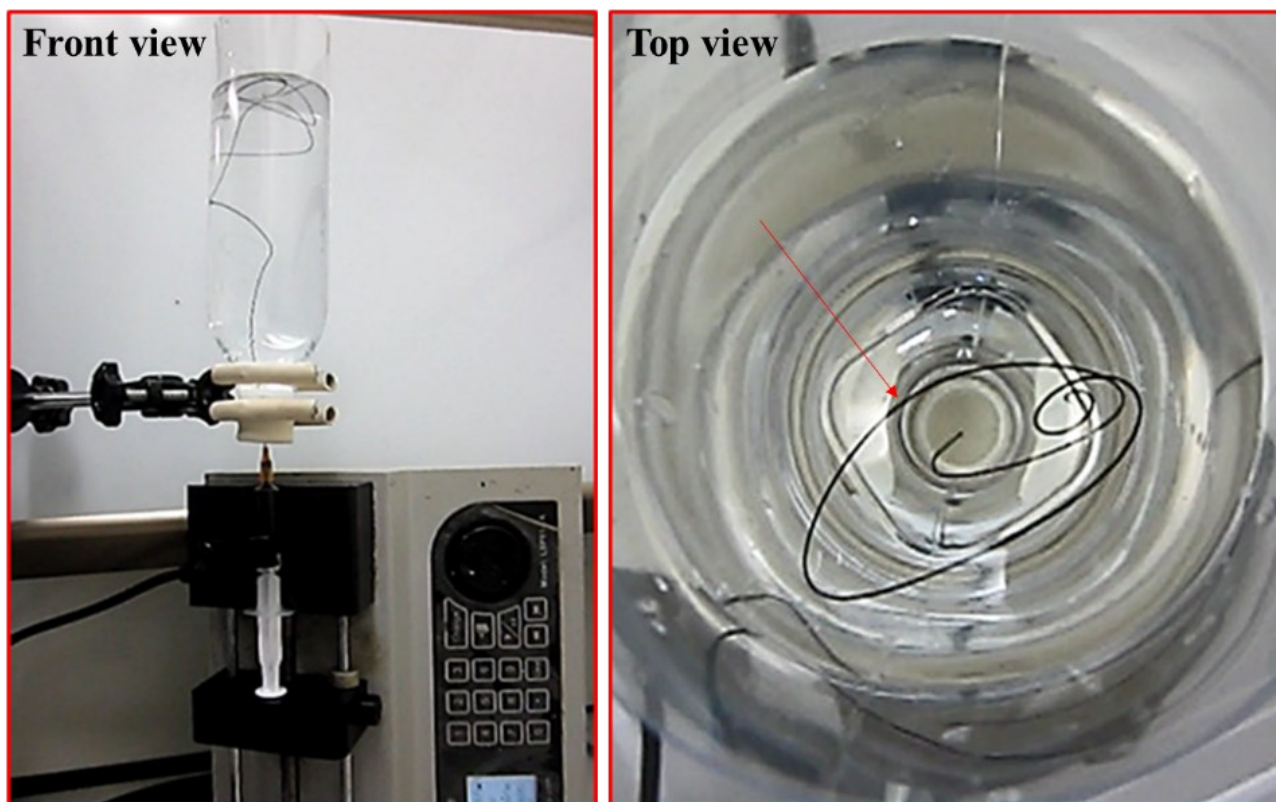

**Figure S7.** Digital images of assembled wet-spinning device.

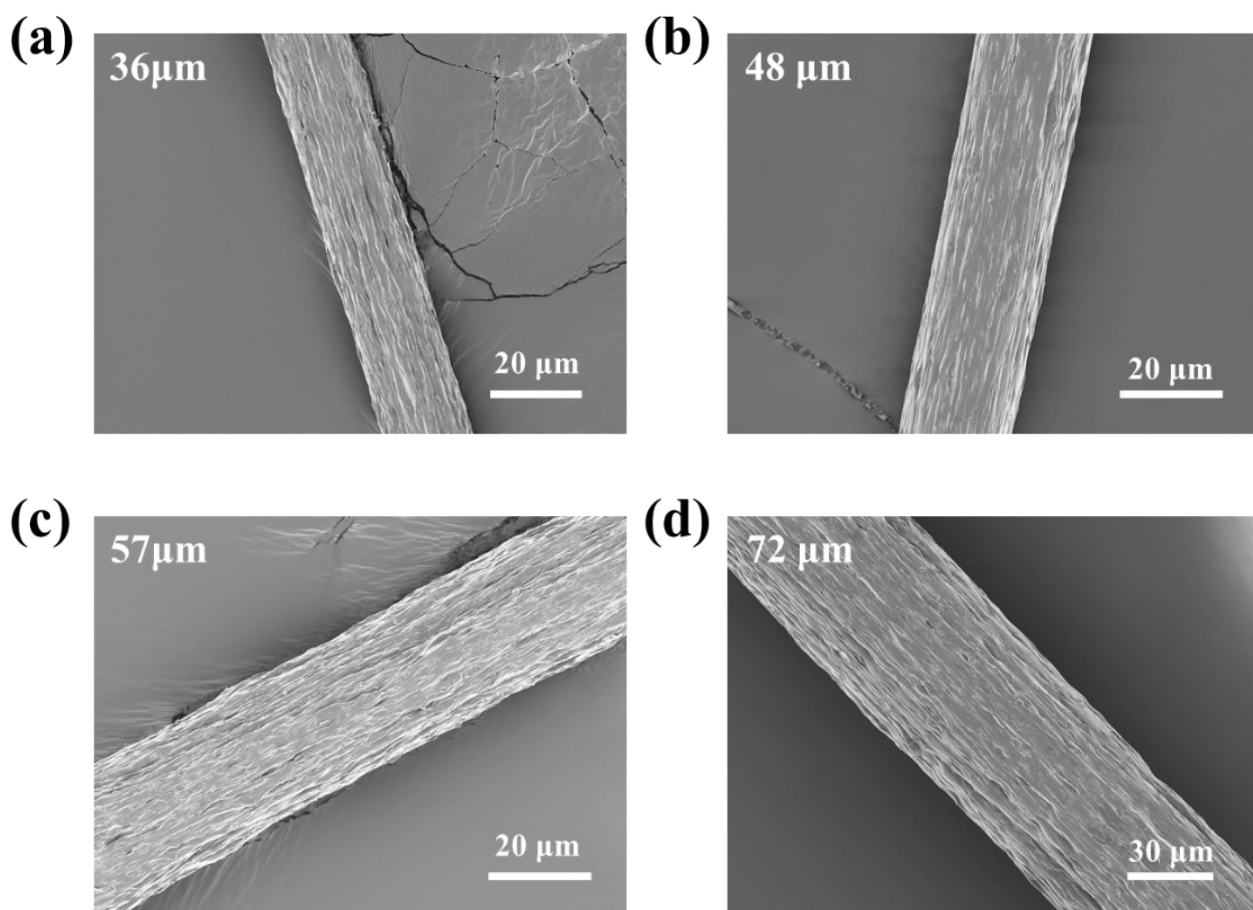

**Figure S8.** SEM images of the CG fibers with apparent diameters from 36 μm to 72 μm.

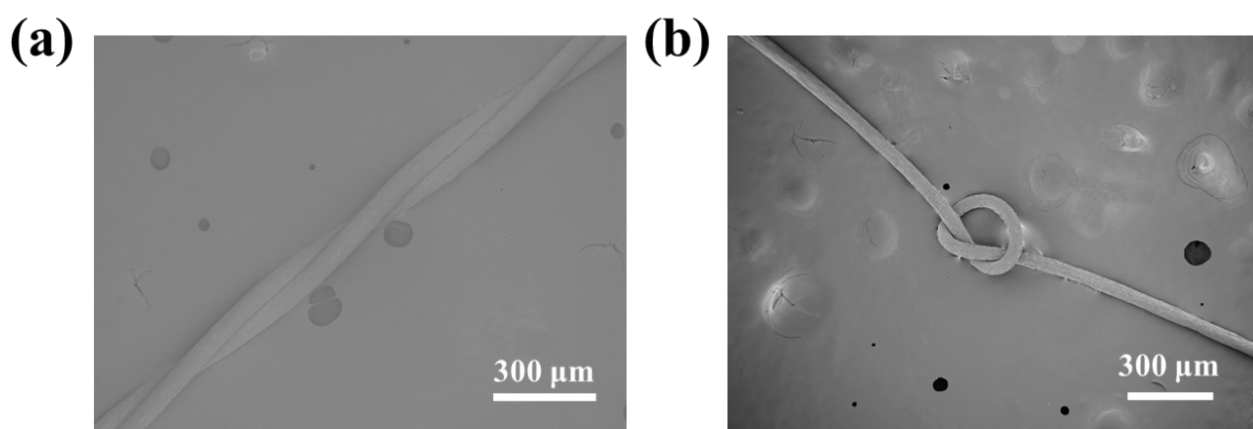

**Figure S9.** SEM images of the knotted (a) and twisted (b) CG fibers.

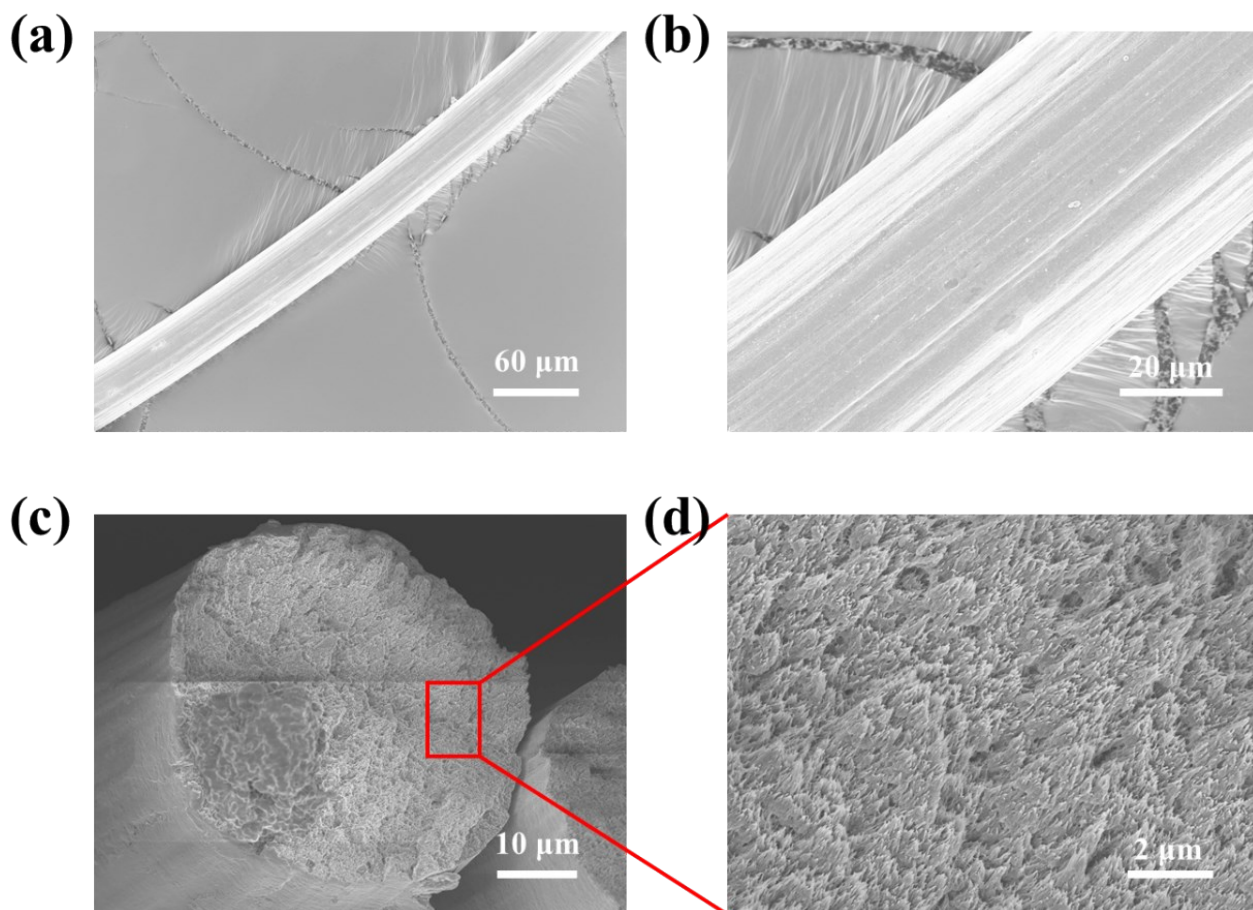

**Figure S10.** SEM images of the PC fibers with (a, b) smooth surface and (c, d) cross sections.

**Table S1.** Strength comparison of the present work and the results reported in literature.

| Nano-fillers | Cellulose     | Solvent involved               | Preparation  | Fiber type                            | Tensile strength          | Ref.     |
|--------------|---------------|--------------------------------|--------------|---------------------------------------|---------------------------|----------|
| Graphene     | Cotton linter | Alkaline-urea aqueous solution | Wet-spinning | Cellulose/graphene                    | 227.9 ± 6.7 MPa           | Our work |
| MWCNTs/rGO   | Cotton pulp   | Ionic liquid                   | Wet-spinning | MWCNTs/rGO/cellulose                  | 2.1 - 5.4 MPa             | 13       |
| BNNS         | Cotton linter | Alkaline-urea aqueous solution | Wet-spinning | RCF/BNNS                              | ~ 140 MPa                 | 14       |
| MXenes       | TOCNFs        | TEMPO, water                   | Wet-spinning | TOCNFs/Ti <sub>3</sub> C <sub>2</sub> | 136.5 ± 21.5 MPa          | 15       |
| GO           | NFC           | TEMPO, water                   | Wet-spinning | GO-NFC                                | 274.6 ± 22.4 MPa          | 16       |
| CNTs         | NFC           | TEMPO, water                   | Wet-spinning | CNT-NFC                               | 247 ± 5 MPa               | 17       |
| CNTs         | TCNF          | TEMPO, water                   | Wet-spinning | TCNF/CNT                              | ~ 240 MPa                 | 18       |
| MWCNT        | Cellulose     | Ionic liquid                   | Wet-spinning | MWCNT/cellulose                       | 257 ± 9 MPa               | 19       |
| SWNT         | CNF           | TEMPO, water                   | Wet-spinning | CNF/SWNT                              | ~ 472.17 MPa              | 20       |
| --           | Cotton pulp   | CS <sub>2</sub> /NaOH          | Wet-spinning | Viscose                               | 18.1 cN/tex<br>(~272 MPa) | 21       |
| --           | Cotton pulp   | CS <sub>2</sub> /NaOH          | Wet-spinning | Modal                                 | 31 cN/tex<br>(~469 MPa)   | 21       |
| --           | Cotton pulp   | NMMO/water                     | Wet-spinning | Lyocell                               | 31.7 cN/tex<br>(~482 MPa) | 21       |
| --           | CNF           | (BC)                           | Wet-drawn    | CNF fiber                             | 826 MPa                   | 22       |

Abbreviations: MWCNTs, multi-walled carbon nanotubes; rGO, reduced graphene oxide; RCF, regenerated cellulose fiber; BNNS, boron nitride nanosheets; TOCNFs, TEMPO (2,2,6,6-tetramethylpiperidine-1-oxyl radical)-mediated oxidized cellulose nanofibrils; GO, graphene oxide; NFC, nanofibrillated cellulose; TCNF, Nanocellulose extracted from tunicate; CS<sub>2</sub>, carbon disulfide; CNF, cellulose nanofibers; NMMO, 4-Methylmorpholine N-oxide; BC; bacterial cellulose

(synthesized by microorganisms, neutralized by NaOH and washed with a large amount of deionized water)

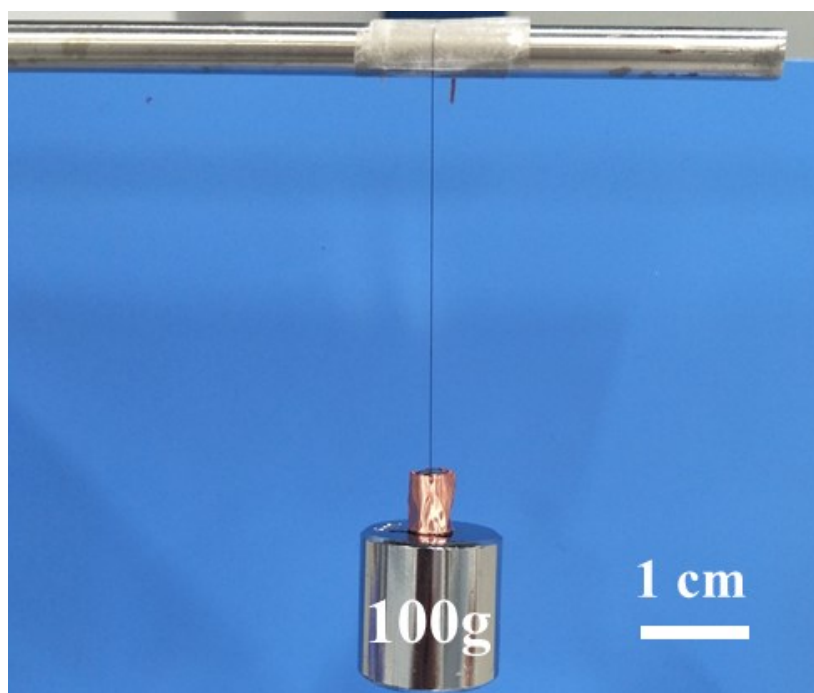

**Figure S11.** Optical image of a weight weighing 100 g suspended by a 70  $\mu\text{m}$  composite fiber.

**Note S2. Calculation of composite fibers density as follows:**

$$V_G = \frac{W_G}{W_G + (\rho_G/\rho_C)(1 - W_G)}$$

$$\rho_{CG} = \rho_G V_G + \rho_C V_C$$

where  $V_G$  and  $W_G$  are the volume and weight fraction of graphene,  $V_C$  and  $\rho_C$  is the volume fraction and density of the PC matrix,  $\rho_{CG}$  is the density of CG composites,  $\rho_G$  is the density of graphene ( $\sim 1.06 \text{ g/cm}^3$ ).<sup>23</sup>

**Table S2.** Specific tensile strengths of the CG fibers with different graphene contents.

| Content (wt%) | Tensile strength (MPa) | Density ( $\text{g} \cdot \text{cm}^{-3}$ ) | Theoretical density ( $\text{g} \cdot \text{cm}^{-3}$ ) | Specific strength ( $\text{MPa}/(\text{g} \cdot \text{cm}^{-3})$ ) |
|---------------|------------------------|---------------------------------------------|---------------------------------------------------------|--------------------------------------------------------------------|
| 0             | 156.10±6.50            | 1.575                                       | —                                                       | 99.11±4.13                                                         |
| 2.5           | 181.01±7.20            | 1.553                                       | 1.556                                                   | 116.56±4.60                                                        |
| 5             | 227.90±6.74            | 1.522                                       | 1.537                                                   | 149.74±4.42                                                        |
| 10            | 147.63±5.63            | 1.474                                       | 1.502                                                   | 100.16±3.80                                                        |
| 15            | 108.10±5.30            | 1.462                                       | 1.468                                                   | 73.94±3.63                                                         |

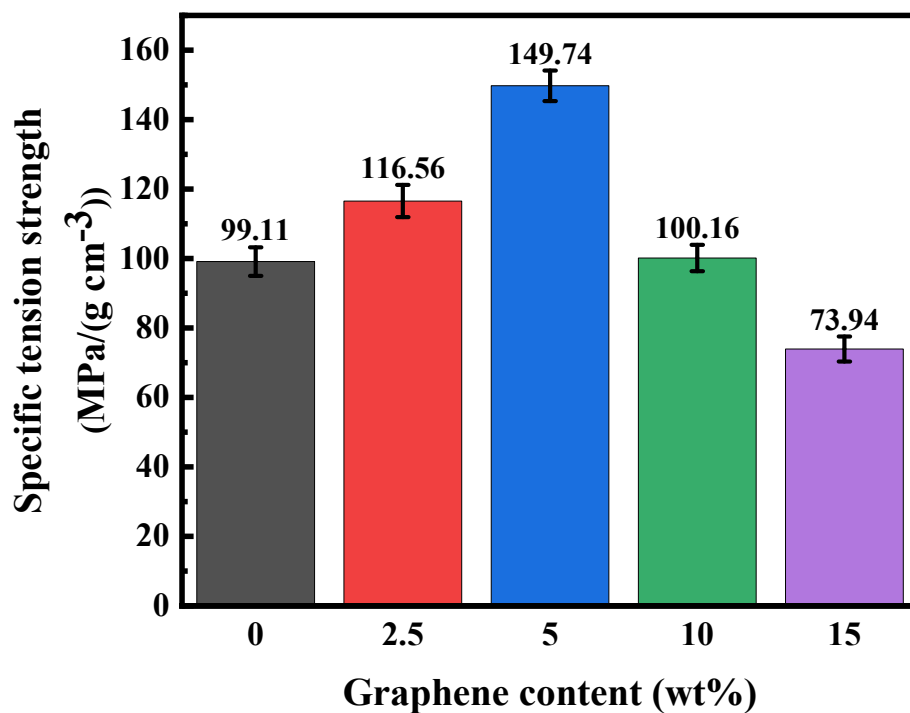

**Figure S12.** Specific tensile strengths of the CG fibers with different graphene contents.



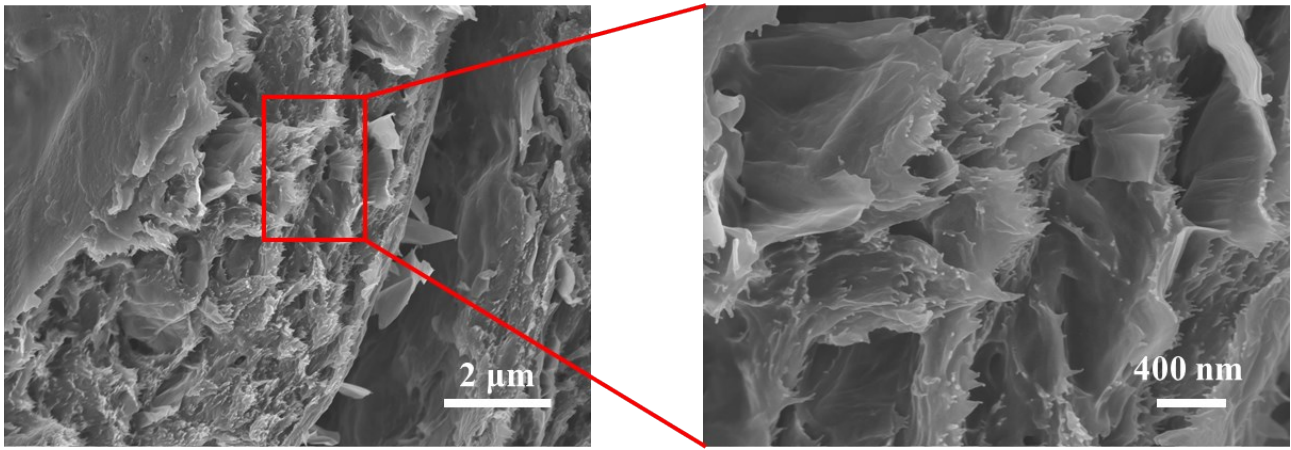

**Figure S13.** SEM images of the cross-section of a broken composite fiber with ductile fracture characteristics.



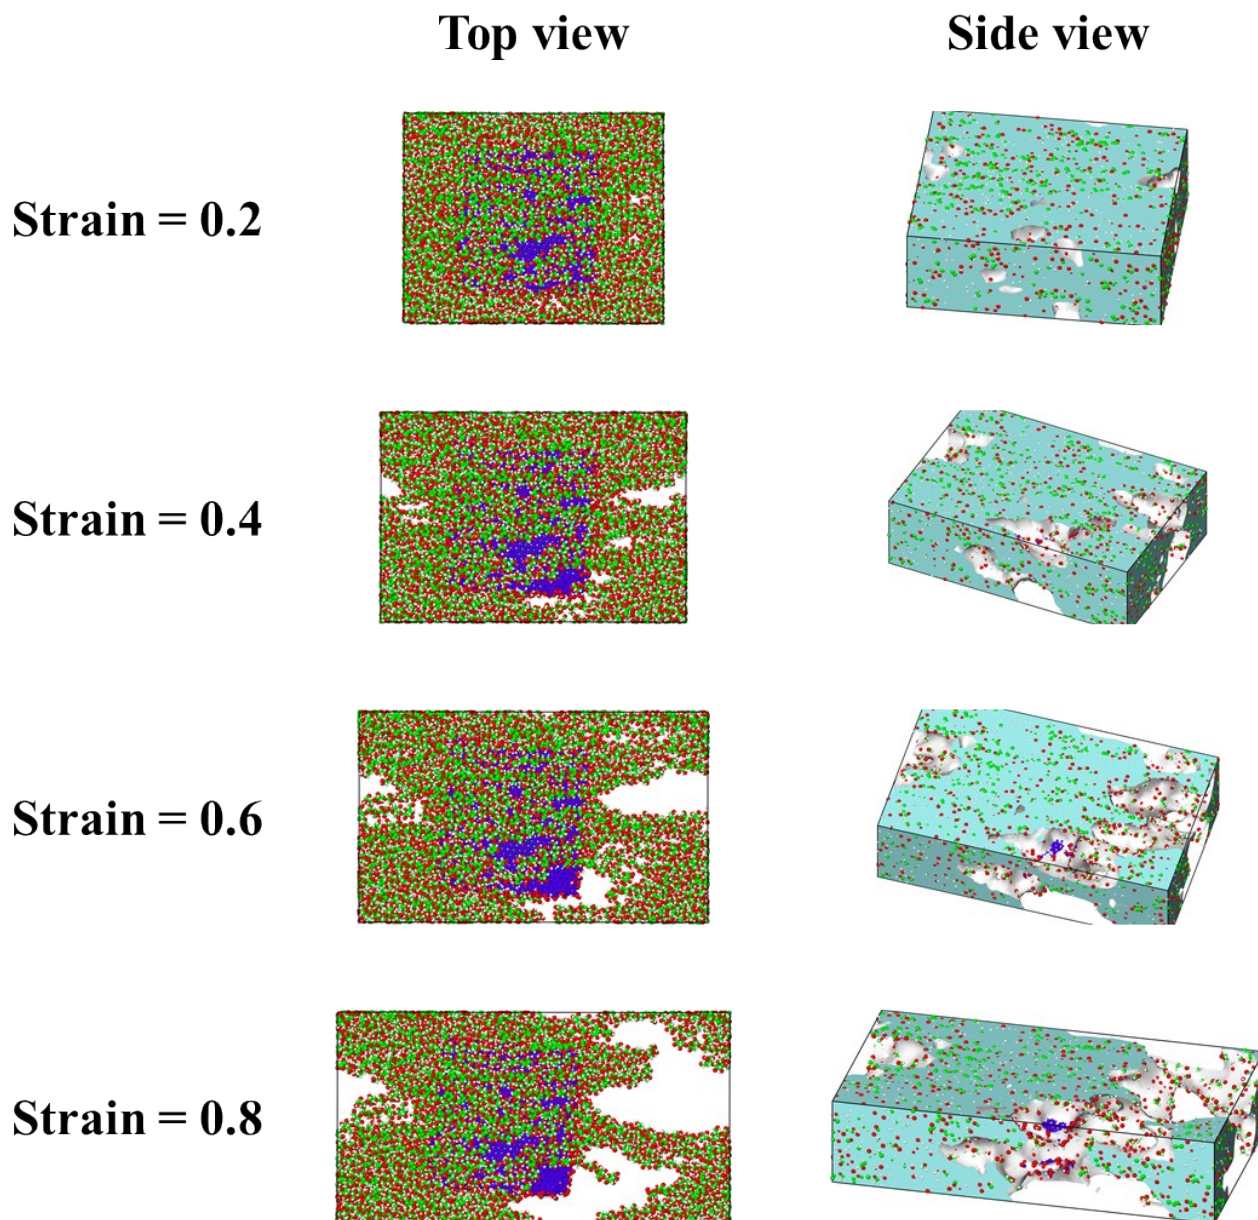

**Figure S14.** Snapshots of fracture failure of CG system during the simulated stretching process. (green: C; red: O; white: H; blue: carbon atoms of graphene)

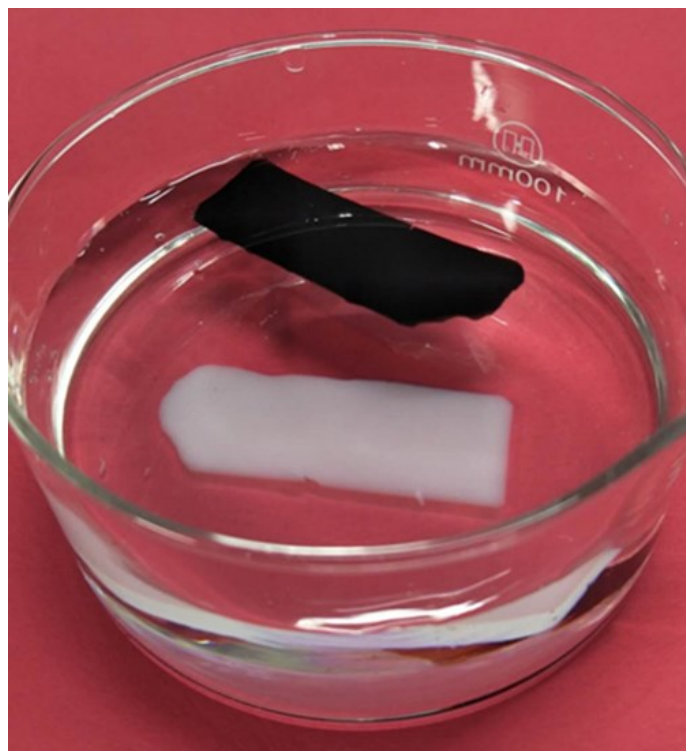

**Figure S15.** Preparation of the CG and PC films in wet-state.

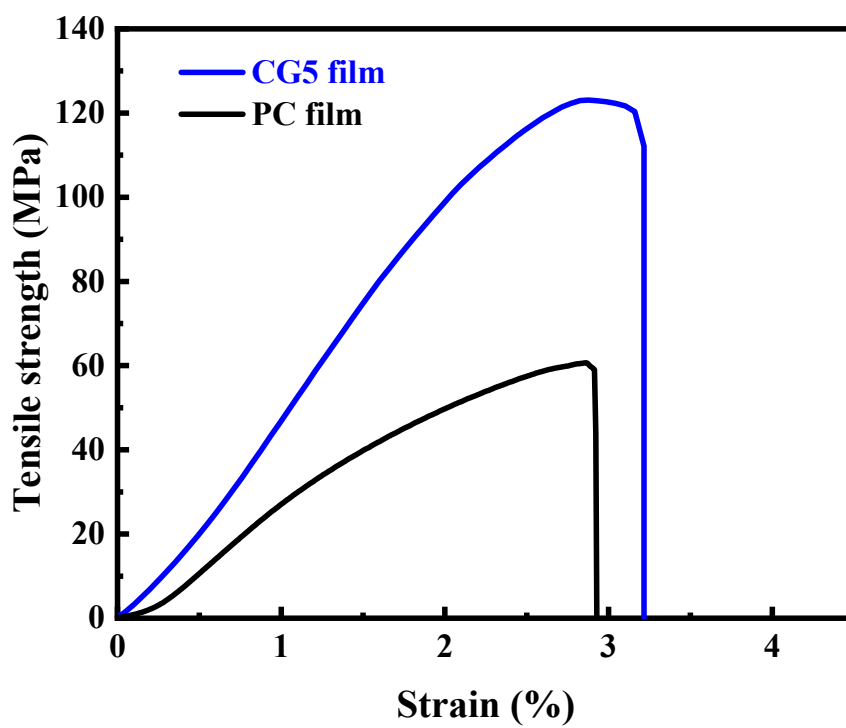

**Figure S16.** Tensile stress-strain curves of the PC and CG5 films.

**Table S3.** Comparison of the performance of the samples used to test the electromagnetic shielding performance.

| Sample    | Tensile strength<br>(MPa) | Strain<br>(%) | Conductivity<br>(S/m) |
|-----------|---------------------------|---------------|-----------------------|
| PC film   | 60.69±2.37                | 2.92±0.35     | 0                     |
| PC fiber  | 156.10±6.50               | 12.88±0.62    | 0                     |
| CG5 film  | 123.10±4.85               | 3.22±0.47     | 0.82                  |
| CG5 fiber | 147.63±5.63               | 11.11±0.59    | 0.51                  |

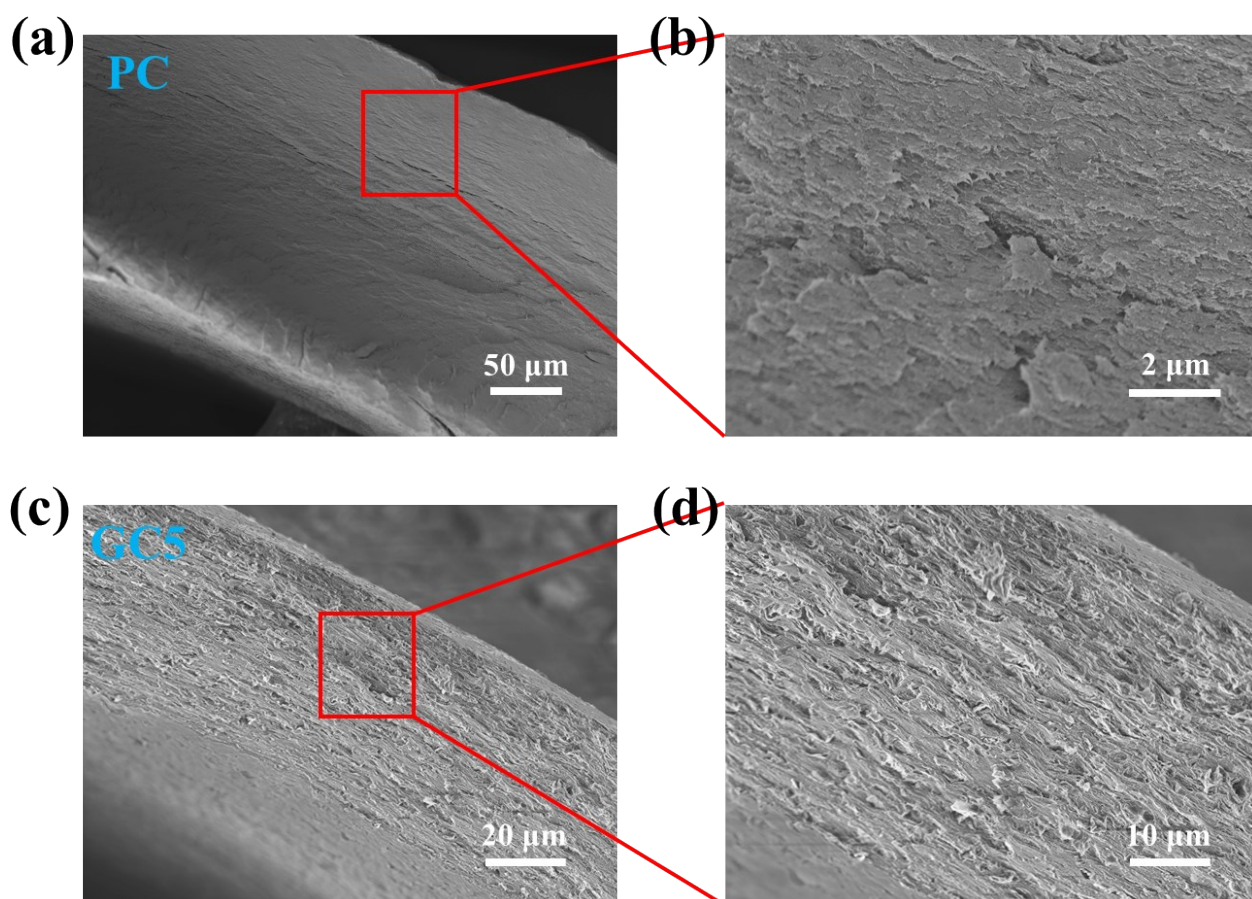

**Figure S17.** SEM images of the fracture cross-section of PC (a, b) and CG5 films (c, d) in dry-state.

**Table S4.** Comparison of conductivity of composites with the literature.

| Material                                    | Nano-filler | Solvent                                                          | Cotent                       | Conductivity<br>(S/m) | Ref.     |
|---------------------------------------------|-------------|------------------------------------------------------------------|------------------------------|-----------------------|----------|
| Cellulose/Graphene fiber                    | Graphene    | Alkaline-urea aqueous solution                                   | 15 wt%                       | 5.11                  | Our work |
| GO–NFC hybrid microfiber                    | GO          | Water                                                            | 50 wt%                       | ~ 0                   | 16       |
| TOCNFs/Ti <sub>3</sub> C <sub>2</sub> fiber | MXenes      | Water                                                            | 30 wt%                       | 4.8                   | 15       |
| Hyperbranched<br>polyglycerol/rGO fiber     | rGO         | DMF                                                              | 66 wt%                       | ~ 4.88                | 24       |
| Cellulose/Graphene films                    | Graphene    | DMAC/LiCl solution                                               | 1.6 wt%                      | 0.00037               | 25       |
| Graphene/Silk fibroin film                  | Graphene    | Hexafluoroisopropanol                                            | 25 wt%                       | 0.032                 | 26       |
| Graphene/PS composites                      | Graphene    | C <sub>2</sub> H <sub>5</sub> OH/CH <sub>2</sub> Cl <sub>2</sub> | 30 wt%                       | 1.25                  | 27       |
| Graphene/PVDF film                          | Graphene    | DMF                                                              | 15 wt%                       | 0.665                 | 28       |
| SWNTS/PNP/PVA fiber                         | SWNTS/PNP   | SDS aqueous solution                                             | SWNTS: 12 wt%<br>PNP: 38 wt% | 96.7                  | 29       |
| CNF/SWNT filaments                          | SWNT        | Water                                                            | 10 wt%                       | 498                   | 20       |

Abbreviations: SDS, sodium dodecyl sulfate; PNP, permalloy nanoparticle

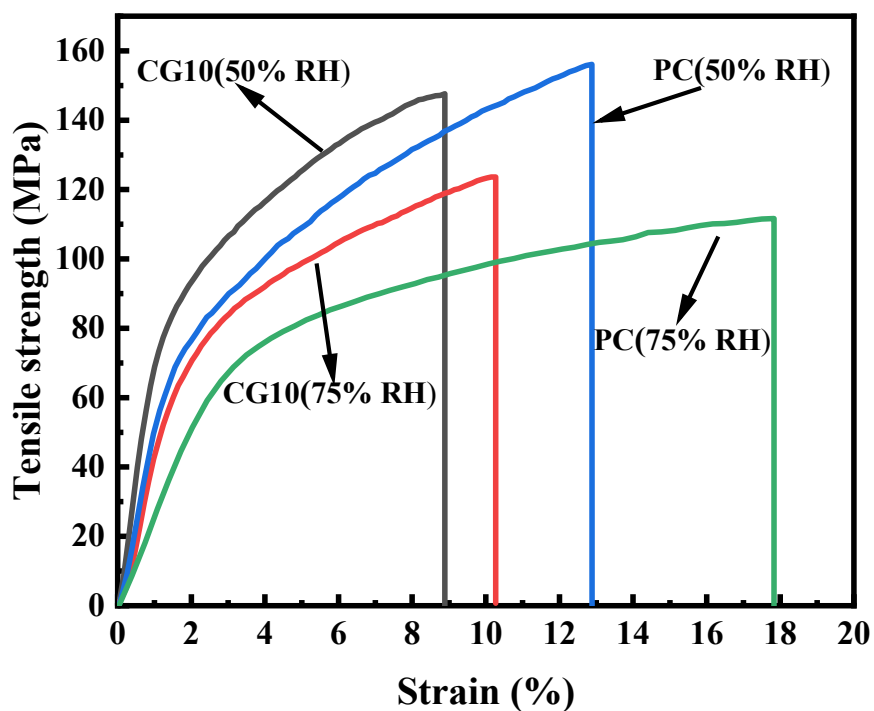

**Figure S18.** Tensile stress-strain curves of PC and CG10 fibers at 50% and 75% RH.

**Table S5.** Impact of humidity on mechanical properties of PC and CG10 fibers.

| Sample       | Tensile strength (MPa) | Strain (%) |
|--------------|------------------------|------------|
| PC(50% RH)   | 156.10±6.50            | 12.88±0.62 |
| PC(75% RH)   | 111.63±4.66            | 17.83±0.86 |
| CG10(50% RH) | 147.63±5.63            | 8.86±0.40  |
| CG10(75% RH) | 123.62±5.18            | 10.27±0.57 |



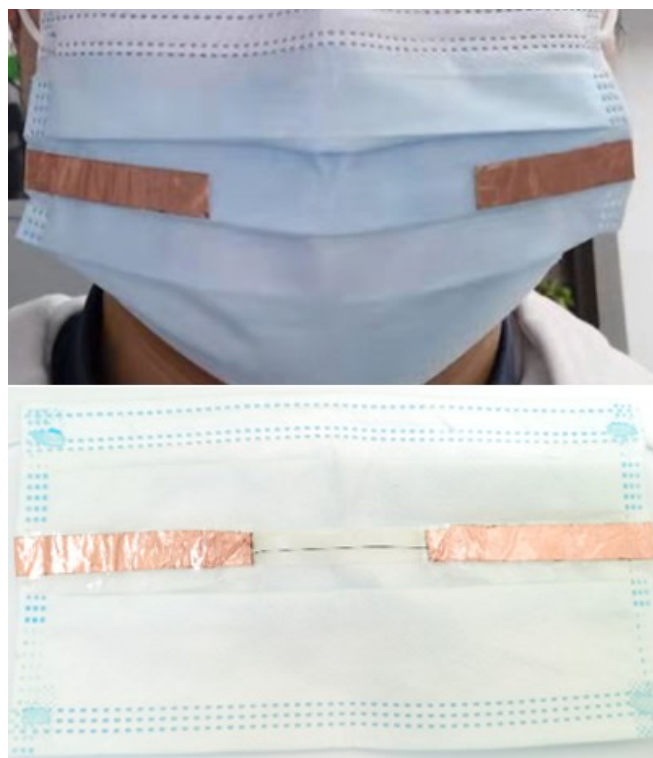

**Figure S19.** A respiratory monitoring sensor based on CG10 fiber; transparent insulating tape was pasted on the copper glue to avoid the interference of human body to the electrical signal.

**Table S6.** Comparison of EMI between our work with the reported results.

| Materials     | Fillers                            | Content                                               | Solvent | Processing                                               | EMI (dB)                   | Ref.      |
|---------------|------------------------------------|-------------------------------------------------------|---------|----------------------------------------------------------|----------------------------|-----------|
| Cellulose     | Graphene                           | 5 wt%                                                 | water   | Directly mixing                                          | 14.6-19.6<br>@6.5-18 GHz   | This work |
| CNF           | RGO                                | 5-30 wt%                                              | water   | TEMPO-modified<br>CNF, HI-reduced<br>GO                  | 3-18<br>@8.2-12.4 GHz      | 30        |
| CNF           | Graphene                           | 12.5-45 wt%                                           | water   | Repeated alternated<br>assembly via<br>vacuum filtration | 11.5-27.4<br>@8.2-12.4 GHz | 31        |
| Cotton linter | RGO+Fe <sub>3</sub> O <sub>4</sub> | RGO: 8 wt%<br>Fe <sub>3</sub> O <sub>4</sub> : 15 wt% | water   | Multi-step washing,<br>reduction etc.                    | 32.4-40.1<br>@8.2-12.4 GHz | 32        |
| CNF           | TRGO                               | 50 wt%                                                | water   | Multi-step process                                       | 10-14<br>@8.2-12.4         | 33        |

Abbreviations: TRGO, thermally reduced graphene oxide

## Reference

- (1) Plimpton, S. Fast Parallel Algorithms for Short-Range Molecular Dynamics. *Journal of Computational Physics* **1995**, *117*, 1-19.
- (2) Sinclair, R. C.; Coveney, P. V. Modeling Nanostructure in Graphene Oxide: Inhomogeneity and the Percolation Threshold. *Journal of Chemical Information and Modeling* **2019**, *59*, 2741-2745.
- (3) Yang, J.; Shi, G.; Tu, Y.; Fang, H. High Correlation between Oxidation Loci on Graphene Oxide. *Angewandte Chemie International Edition* **2014**, *53*, 10190-10194.

- (4) Chenoweth, K.; Van Duin, A. C. T.; Goddard, W. A. ReaxFF Reactive Force Field for Molecular Dynamics Simulations of Hydrocarbon Oxidation. *The Journal of Physical Chemistry A* **2008**, *112*, 1040-1053.
- (5) Humphrey, W.; Dalke, A.; Schulten, K. VMD: Visual molecular dynamics. *Journal of Molecular Graphics* **1996**, *14*, 33-38.
- (6) Stukowski, A. Visualization and analysis of atomistic simulation data with OVITO—the Open Visualization Tool. *Modelling and Simulation in Materials Science and Engineering* **2009**, *18*, 015012.
- (7) Cai, J.; Zhang, L.; Liu, S.; Liu, Y.; Xu, X.; Chen, X.; Chu, B.; Guo, X.; Xu, J.; Cheng, H.; Han, C. C.; Kuga, S. Dynamic Self-Assembly Induced Rapid Dissolution of Cellulose at Low Temperatures. *Macromolecules* **2008**, *41*, 9345-9351.
- (8) Fernandez, L. P.; Hepler, L. G. Heats and Entropies of Ionization of Phenol and Some Substituted Phenols. *Journal of the American Chemical Society* **1959**, *81*, 1783-1786.
- (9) Read, A. J. Ionization constants of benzoic acid from 25 to 250°C and to 2000 bar. *Journal of Solution Chemistry* **1981**, *10*, 437-450.
- (10) Li, D.; Müller, M. B.; Gilje, S.; Kaner, R. B.; Wallace, G. G. Processable aqueous dispersions of graphene nanosheets. *Nature Nanotechnology* **2008**, *3*, 101-105.
- (11) Chen, H.; Du, W.; Liu, J.; Qu, L.; Li, C. Efficient room-temperature production of high-quality graphene by introducing removable oxygen functional groups to the precursor. *Chemical Science* **2019**, *10*, 1244-1253.
- (12) Ohshima, H. Approximate Expression for the Double-Layer Interaction Energy



between Two Parallel Plates with Constant Surface Charge Density. *Journal of Colloid and Interface Science* **1999**, *212*, 130-134.

(13) Liu, Y. R.; Wang, Y. L.; Nie, Y.; Wang, C. L.; Ji, X. Y.; Zhou, L.; Pan, F. J.; Zhang, S. J., Preparation of MWCNTs-Graphene-Cellulose Fiber with Ionic Liquids. *ACS Sustainable Chemistry & Engineering* **2019**, *7* (24), 20013-20021.

(14) Wu, K.; Yu, L.; Lei, C.; Huang, J.; Liu, D.; Liu, Y.; Xie, Y.; Chen, F.; Fu, Q., Green Production of Regenerated Cellulose/Boron Nitride Nanosheet Textiles for Static and Dynamic Personal Cooling. *ACS Applied Materials & Interfaces* **2019**, *11* (43), 40685-40693.

(15) Cao, W.-T.; Ma, C.; Mao, D.-S.; Zhang, J.; Ma, M.-G.; Chen, F., MXene-Reinforced Cellulose Nanofibril Inks for 3D-Printed Smart Fibres and Textiles. *Adv Funct Mater* **2019**, *29* (51), 1905898.

(16) Li, Y.; Zhu, H.; Zhu, S.; Wan, J.; Liu, Z.; Vaaland, O.; Lacey, S.; Fang, Z.; Dai, H.; Li, T.; Hu, L., Hybridizing wood cellulose and graphene oxide toward high-performance fibers. *NPG Asia Materials* **2015**, *7* (1), e150-e150.

(17) Li, Y.; Zhu, H.; Wang, Y.; Ray, U.; Zhu, S.; Dai, J.; Chen, C.; Fu, K.; Jang, S.-H.; Henderson, D.; Li, T.; Hu, L., Cellulose-Nanofiber-Enabled 3D Printing of a Carbon-Nanotube Microfiber Network. *Small Methods* **2017**, *1* (10), 1700222.

(18) Cho, S.-Y.; Yu, H.; Choi, J.; Kang, H.; Park, S.; Jang, J.-S.; Hong, H.-J.; Kim, I.-D.; Lee, S.-K.; Jeong, H. S.; Jung, H.-T., Continuous Meter-Scale Synthesis of Weavable Tunicate Cellulose/Carbon Nanotube Fibers for High-Performance Wearable Sensors. *ACS Nano* **2019**, *13* (8), 9332-9341.

- (19) Rahatekar, S. S.; Rasheed, A.; Jain, R.; Zammarano, M.; Koziol, K. K.; Windle, A. H.; Gilman, J. W.; Kumar, S., Solution spinning of cellulose carbon nanotube composites using room temperature ionic liquids. *Polymer* **2009**, 50 (19), 4577-4583.
- (20) Wan, Z.; Chen, C.; Meng, T.; Mojtaba, M.; Teng, Y.; Feng, Q.; Li, D., Multifunctional Wet-Spun Filaments through Robust Nanocellulose Networks Wrapping to Single-Walled Carbon Nanotubes. *ACS Applied Materials & Interfaces* **2019**, 11 (45), 42808-42817.
- (21) Kreze, T.; Malej, S., Structural Characteristics of New and Conventional Regenerated Cellulosic Fibers. *Textile Research Journal* **2003**, 73 (8), 675-684.
- (22) Wang, S.; Jiang, F.; Xu, X.; Kuang, Y.; Fu, K.; Hitz, E.; Hu, L., Super-Strong, Super-Stiff Macromolecules with Aligned, Long Bacterial Cellulose Nanofibers. *Advanced Materials* **2017**, 29 (35), 1702498.
- (23) Rafiee, M. A.; Rafiee, J.; Wang, Z.; Song, H.; Yu, Z.-Z.; Koratkar, N. Enhanced Mechanical Properties of Nanocomposites at Low Graphene Content. *ACS Nano* **2009**, 3, 3884-3890.
- (24) Hu, X.; Xu, Z.; Gao, C., Multifunctional, supramolecular, continuous artificial nacre fibres. *Scientific Reports* **2012**, 2 (1).
- (25) Zhang, X. M.; Liu, X. Q.; Zheng, W. G.; Zhu, J., Regenerated cellulose/graphene nanocomposite films prepared in DMAC/LiCl solution. *Carbohydrate Polymers* **2012**, 88 (1), 26-30.
- (26) Ling, S.; Wang, Q.; Zhang, D.; Zhang, Y.; Mu, X.; Kaplan, D. L.; Buehler, M. J., Integration of Stiff Graphene and Tough Silk for the Design and Fabrication of

Versatile Electronic Materials. *Adv Funct Mater* **2018**, 28 (9), 1705291.

(27) Yan, D.-X.; Ren, P.-G.; Pang, H.; Fu, Q.; Yang, M.-B.; Li, Z.-M., Efficient electromagnetic interference shielding of lightweight graphene/polystyrene composite.

*Journal of Materials Chemistry* **2012**, 22 (36), 18772-18774.

(28) Zhao, B.; Zhao, C.; Li, R.; Hamidinejad, S. M.; Park, C. B., Flexible, Ultrathin, and High-Efficiency Electromagnetic Shielding Properties of Poly(Vinylidene Fluoride)/Carbon Composite Films. *ACS Applied Materials & Interfaces* **2017**, 9 (24), 20873-20884.

(29) Zhou, G.; Wang, Y.-Q.; Byun, J.-H.; Yi, J.-W.; Yoon, S.-S.; Cha, H.-J.; Lee, J.-U.; Oh, Y.; Jung, B.-M.; Moon, H.-J.; Chou, T.-W., High-Strength Single-Walled Carbon Nanotube/Permalloy Nanoparticle/Poly(vinyl alcohol) Multifunctional Nanocomposite Fiber. *ACS Nano* **2015**, 9 (11), 11414-11421.

(30) Yang, W.; Zhao, Z.; Wu, K.; Huang, R.; Liu, T.; Jiang, H.; Chen, F.; Fu, Q., Ultrathin flexible reduced graphene oxide/cellulose nanofiber composite films with strongly anisotropic thermal conductivity and efficient electromagnetic interference shielding. *Journal of Materials Chemistry C* **2017**, 5 (15), 3748-3756.

(31) Li, L.; Ma, Z.; Xu, P.; Zhou, B.; Li, Q.; Ma, J.; He, C.; Feng, Y.; Liu, C., Flexible and alternant-layered cellulose nanofiber/graphene film with superior thermal conductivity and efficient electromagnetic interference shielding. *Composites Part A: Applied Science and Manufacturing* **2020**, 139, 106134.

(32) Chen, Y.; Pötschke, P.; Pionteck, J.; Voit, B.; Qi, H., Multifunctional Cellulose/rGO/Fe<sub>3</sub>O<sub>4</sub> Composite Aerogels for Electromagnetic Interference

Shielding. *ACS Applied Materials & Interfaces* **2020**, 12 (19), 22088-22098.

(33) Han, G.; Ma, Z.; Zhou, B.; He, C.; Wang, B.; Feng, Y.; Ma, J.; Sun, L.; Liu, C., Cellulose-based Ni-decorated graphene magnetic film for electromagnetic interference shielding. *Journal of Colloid and Interface Science* **2021**, 583, 571-578.
